# Supplementary material for: The HrpG/HrpX Regulon of Xanthomonads—An Insight to the Complexity of Regulation of Virulence Traits in Phytopathogenic Bacteria
Source: PubMed Central journal article supplement (PMC7831014; doi:10.3390/microorganisms9010187), 2021-01-16
Supplement: microorganisms-09-00187-s001.pdf [file microorganisms-09-00187-s001.pdf]

Xeu **tcagcagggcggctgcgatggtgcagggccaagacttgggctaacggccttgctcattgt**  
Xcci **tcagcagggcggctgcgatggtgcagggccaagggcttgggctcacggccttgctcattgt**  
Xoo **tcagcagggcggctggtcgatggtgcgggctgagacttaggctgacagccttgctcatcgt**  
Xcc **tcagcaagctgcggtgcgattgaccgtattggacgtcatgc-----ccttggaggggtgc**  
\*\*\*\*\*.\* \*\* \*.\*\*.\* \*\* . \* \* ..... \*.. \*\* \*\*\*\*\* . .\*

Xeu **cgttgccctcggatcgtgcaacgcgagctccaacttgtagccgtgccaatagacggttct**  
Xcci **cgttgccctcggatcgtgcaacgcgagctccaacttgtagccgtgccaatagacggttct**  
Xoo **tgttgcatctttgtcttgcagcggcagctccaacttgtagccatgccaatagacggttct**  
Xcc **cgccgtgttgccgtccgacagcggcagttcgagcttgtagccatgccaatagacggtgcg**  
\*..\*.\* \* . \*\* .\*\*.\* \*\* \*..\*\* \*..\*\*\*\*\*.\*\*\*\*\* \*\*\*\*\* \*

Xeu **gatgcgcaaccgcgctgctgtcaccgctcagctgcagtttcttgcgcaactttagatgtg**  
Xcci **gatgcgcaactgcgctgctgtcactgctcagctgcagtttcttgcgcaactttagatgtg**  
Xoo **gatgcgcaactgcgctgctgtgattgcccagctgcagtttcttgcgcaactttagatgtg**  
Xcc **aatgcgcaactgcgccactgtggttgcacagcggcagtttcttgcgcaactttagatgtg**  
.\*\*\*\*\*\*.\*\*\*.\*..\*\* \*..\*\* \*..\*\*\*\*\*.\*\*\*\*\*.\*\*\*\*\*.\*\*\*

Xeu **ctgctccatgggtgcggtcggatgaattcgggtatggctgcccagaccgcttggccagctg**  
Xcci **ctgctccatgggtgcggtcggatgaattcgggtatggctgcccagaccgcttggccagctg**  
Xoo **ctgctccatgggtgcggtcggatgaattcgggtatggctgcccagaccgcttggccagctg**  
Xcc **ctgttccatgggtgcggtcggatgaactcgggtatggctaccccagactgccttggccagctg**  
\*\*\*.\*\*\*\*\*\*.\*\*\*\*\*.\*\*\*\*\*.\*\*\*\*\* \*\*\*\*\*.\*\*\*\*\*.\*\*\*

Xeu **gcaacgcgggaagcacagcggggctggaaaagagcagccaggcaatcgagaactcgcg**  
Xcci **gcaacgcgggaagcacagcggggctggaaaagagcagccaggcaatcgagaactcgcg**  
Xoo **gcaacgcgggaagcacagcggctggggctggaaaatagcagccaggcaatcgaaaactcgcg**  
Xcc **gcagcggggaagcacagcggggattcgaaaacagcagccaggcgatggagaactcgcg**  
\*\*\*.\* \*\* \*\*\*\*\*.\*\*\*\*\*\* \*\*.\* \* \*\*\*\*\* \*\*\*\*\*.\*\*\* \*\*.\*\*\*\*\*\*

Xeu **tgcggtcaacgcgatcggcttgccttccaggtagacggatatttcatcgcggatcagctt**  
Xcci **tgcggtcaatacgcgatcggcttgccttccagataaacggatatttcatcgcggatcaaccg**  
Xoo **tgcggtcagcagcatcggcttgccttccagataaacggatatttcatcgcggagcaactg**  
Xcc **cgcggtcaaggcaatcgcggtttctgaggtacaccgtgttcttctcgcggagcagctg**  
.\*\*\*\*\*\*.\*.\*.\*\*\* \* . \* \* \*\*.\* \*\* \* \*\*.\*\*\*.\*. \*\*\*\*\* \*\*.\*.

Xeu **gtagggacccacgctcaggtgctgcttccgggcaggcatgcgccaccggcgatagcgc**  
Xcci **gtatggaccaacgctcaggtgctgcttccgggcaggcatgcgccaccggcgatagcgc**  
Xoo **gtatggaccaacgctgagttgctgcttccgggcaggcatgcgccaccggcgatagcgc**  
Xcc **atagggccaccttgatctgctgggctggatgcaggtggctgccatcgcccaaatggc**  
.\* \*\*.\* \*\* \* . \* \* \*\*\*\*\* \*..\* . \*\*\*\*\*.. \*\*\*\*\*.\*\*\*\*\* \* \* \*\*

Xeu **cagggcgcgacgctgcaactcatgcaattgaaaggcagcgcgaaggacctcctgccc**  
Xcci **cagcgcgcgacgctgtaactcgtgcaattgaaaggcagcgcgaaggacctcctgccc**  
Xoo **cagggcgcgctacctgcaattcgtgaggatgaaagggagcgcgaaggacctcctgccc**  
Xcc **gagcgcgcgacatgcaactcgtgtgagttgactggcaggctgagcacttctggtggc**  
\* \* \* .\*\*\*\*\*.\* \*\*.\*\*\*.\*\*\*.\*\*\*.\*\*\*.\*\*\* \* \* \* .\*\*.\* \*\*.\* \*\* \* \*\*

Xeu **gcctgcgcataccagggcagaatggtgtcggcgcaatcgaaacggccaagcagatcag**  
Xcci **gcctgcgcataccagggcagaatggtgtcggcgcaatcgaaacgtccaagcagatcaa**  
Xoo **gcccgcgcataccagtcaggatgtcgttggcgagtcgaaacggccagcagatcag**  
Xcc **gcccgcgcataccagggcagaatcgtggtggcactcgaaacggccagcacaatcag**  
\*\*\* \*\*\*\*\*.\*\*\*\*\* \* \*\*.\*\*\*.\* \* \*\* \*\*\*\*\* \* \* \*\*\*\*\*.\*\*\*.\*.

Xeu **cgccgtgggctggcggctatggcagcgtgccaggccagcagtgactgtcatcggcggc**  
Xcci **cgccgtgggctggcggctatggcagcgtgccatgccagcagtgactgtcatcggcggc**  
Xoo **cgccgtgggatgaccgctatggcagcgtgccaggccagcagcagcttctcgtcggaggc**





Xcc tttgttgtttttgctcctcccctt--cagagagcccggc **atgatacctttcgacctactt**  
\*\*\*\* .\*\*\*\*\* \*\*\*\*. . \*\*\*\*\* \*\*\*\*\*\*\*\*\*\* \*\* .\*\*\*\*\*

Xeu tgcagcgatctctgcggttgctacacgcagaacgtcttcctacctatacgcagcaggatgct  
Xcc **tgcagcgatctctgcggttgctacacgcagaacgtcttcctacctatacgcagcaggatgct**  
Xoo tgcagcgatctctgcggttgcttctacgcagaacgtcttcctacctatacgcagcaggatgct  
Xcc **cgagcgatctctgcggttgcttctacgcagaccgtcttcgatctatacgcagcaggatgct**  
.\*\*\*\*\* \*\*\*\*\* \*\*\*\*\* \* .\*\*\*\*\*

Xeu ggttggtgcttggccaagggactgcaacatctccaacagcgcgcgcagcggacagggcgc  
Xcci ggttggtgcttggccaagggactgcaacatctccaacagcgcgcgcagcggacagggcgc  
Xoo ggttggtgcttggccgcagggactgcaacaccttcaacagcgcgcgcagggcaggggc  
Xcc **tggttggtgcttggccaagggctctgcagcacctccagcaacgtcgcgaggggcagggcgc**  
\*\*\*\*\*.\*\*\*\*\* \*\*\*\*\* .\*\*.\*.\*.\*.\*.\*.\*.\*.\*.\*.\* \*\*\*\*\* \*\*.\*\*\*\*\* \*\*

Xeu agcggatggcgccgacgatgaggtcagcttggttcgggtgccagcggcgatgctgtgctgat  
Xcci tgtggatggcgccgacgatgaggtcagcttggttcgggtgccagcggcgatgctgtgctgat  
Xoo agcggatggcgccgacgatgaggtcagcttggttcgggtgccagcggcgatgctgtgctgat  
Xcc **tccggatggcgccgacgcaagtcgcatgctggggcgccagcggcgatgctgtgctgat**  
. \*\*\*\*\* . \*\*\*.\*.\*.\*.\*.\*.\*.\*.\*.\*.\*.\*.\*.\*.\*.\*.\*.\*.\*.\*.\*.\*.\*

Xeu cctggaatatcaggaagaggccgaagatgctatcggcaggccttgaaggccatgctgagg  
Xcci cctggaatatcaggaagaggccgaagatgctatcggcaggccttgaaggccatgctgagg  
Xoo cctggaatatcaggaagaggccgaagacgctatcggcaggccttgaaggccatgctgagg  
Xcc **tctggagtatcaggaagaggcagaggatgctatcggcaggccttgaaggccatgctgagg**  
.\*\*\*\*\*.\*\*\*\*\*.\*\*\*\*\* \*\*.\*.\*.\*.\*.\*.\*.\*.\*.\*.\*.\*.\*.\*.\*.\*.\*.\*.\*

Xeu gcatcagcgccaattgcgctgctgtcgtgcccgaacaccgctggttgatgctgagaca  
Xcci gcatcagcgccaattgcgctgctgtcgtgcccgaacaccgctggttgatgctgagaca  
Xoo gcatcagcgccaattgcgctgctgtcgtgcccgaacaccgctggttgatgctgagaca  
Xcc **gcaccagcggcagctgcgctgctgtcgtgcccgaacaccgctggttgatgctgagaca**  
\*\*\* \*\*\*\*\* \*\*.\*.\*.\*.\*.\*.\*.\*.\*.\*.\*.\*.\*.\*.\*.\*.\*.\*.\*.\*.\*.\*.\*

Xeu gggcgctgagcggcggttgaattgcttcgagcagttggcaatggaccgcaaacgccc  
Xcci gggcgctgagcggcggttgaattgcttcgagcagttggcaatggaccgcaaacgctc  
Xoo gggcgctgagcggcggttgaattgcttcgagcagttggcaatggaccgcaaacgccc  
Xcc **ggcgctgagcggcgctcaattgcttcgcaactggccatggaccgcaaacgccc**  
\*\*\* \*\* \*\*\*\*\*.\*.\*.\*.\*.\*.\*.\*.\*.\*.\*.\*.\*.\*.\*.\*.\*.\*.\*.\*.\*.\*.\*

Xeu gccagcctgtgcggcgagagcctggtgggcaaatcgctcaccacttccatctgggcca  
Xcci gccagcctgtgcggcgagagcctggtgggcaagtgcctgaccacttccatctgggcca  
Xoo gccagcctgtgcggcgagagcctggtgggcaaggcactgaccacttccatctgggcca  
Xcc **ggcggtgctgtggtggcgagagcctgctcggcaaggcctgaccacttccactgggcca**  
\* . \*\*\*\*\*.\*.\*.\*.\*.\*.\*.\*.\*.\*.\*.\*.\*.\*.\*.\*.\*.\*.\*.\*.\*.\*.\*

Xeu gagcacgttggccttacagaccctggagcgtgcccgaggtgctggccgacctggagag  
Xcci gagtacgttggccttacagaccctggagcgtgcccgaggtgctggccgacctggagag  
Xoo gagcacgttggccttacagaccctggagcgtgcccgaggtgctggccgagctggagag  
Xcc **gagcacctggcactgcagacgctggaacgcgcgcaagaggtggttccgagctggagct**  
\*\*\*.\*.\*.\*.\*.\*.\*.\*.\*.\*.\*.\*.\*.\*.\*.\*.\*.\*.\*.\*.\*.\*.\*

Xeu cggcgctggaactggctgaggattgccactgcgctgctgacatgattgcccagct  
Xcci cggggcgtcggaatggctgaggatgccaatgcgctgctgacatgattgcccagct  
Xoo tgggtgcttccgattggctgctgctgccaccgctgctgaggctgacatgattgcccagct  
Xcc **cggtgcccggactggacgctggtgctggcgctgctgacatgattgcccagct**  
.\*\* \*\* \* \*\* \*\*\* .\*\*\* .\* \*.\*.\*.\*.\*.\*.\*.\*.\*.\*.\*.\*.\*.\*.\*.\*.\*.\*





**Fig S1.** Multiple DNA sequence alignment of *hrpX*, *hrpG* and their intragenic regions of *X. euvesicatoria* (*Xeu*) 85-10 strain (genomic region 4996282-4999333), *X. citri* pv. *citri* (*Xcci*) 306 strain (genomic region 1444841-1447887), *X. oryzae* pv. *oryzae* (*Xoo*) KACC10331 strain (genomic region 1411025-1414008) and *X. campestris* pv. *campestris* (*Xcc*) 8004 strain (genomic region 3682705-3685746). Alignment was conducted using Clustal Omega under default settings (<https://www.ebi.ac.uk/Tools/msa/clustalo/>). The coding regions of *hrpG* are marked in yellow. The coding regions of *hrpX* are marked in green. The Start codons of *hrpG* and *hrpX* are marked in underlined blue. The stop codons of *hrpG* and *hrpX* are marked in underlined pink.
